# Supplementary material
Source: PubMed Central journal article supplement (PMC4061398)

## **Supplementary video legends**

**Supplementary video 1:** Timelapse phase contrast imaging of acini lacking centrosome amplification (-Dox). 3-D culture was for 4 days prior to initiating imaging. Images were acquired over 20hrs with images acquired every 4 minutes.

**Supplementary video 2:** Timelapse imaging of an acinus with centrosome amplification as in Supplementary Movie 1. Note that invasive protrusions are dynamic.

**Supplementary video 3:** Multiple cells can migrate into an invasive protrusion from acini with multiple centrosomes. Imaging was as in Supplementary Movie S2 except that images were acquired for 8hrs and nuclei were visualized by fluorescence imaging every 4 minutes to detect nuclei marked by H2B-GFP. Phase contrast images were acquired at each timepoint with the fluorescence images.

**Supplementary video 4:** Time lapse imaging of dividing single cells in 2-D substrates that stay together after mitosis. Images were acquired for 15hrs and nuclei were visualized by fluorescence imaging every 4 minutes to detect nuclei marked by H2B-GFP. Phase contrast images were acquired at each timepoint with the fluorescence images. Note that this time lapse represents only 5rs of the original 15hrs movie.

**Supplementary video 5:** Time lapse imaging of dividing single cells on 2-D substrates that move apart after mitosis. Images were acquired for 15hrs and nuclei were visualized by fluorescence imaging every 4 minutes to detect nuclei marked by H2B-GFP. Phase contrast images were acquired at each timepoint with the fluorescence images. Note that this time lapse represents only 5rs of the original 15hrs movie.

**Supplementary video 6:** Time lapse imaging of a monolayer of MCF10A cells expressing Raichu-Rac to visualize cell-cell boundaries. Images were acquired every

5 minutes for 12.4 hrs to monitor cell-cell edges interactions marked by Raichu-Rac-CFP. Scale bar :10 $\mu$ m

**Supplementary video 7:** Time lapse imaging of a monolayer of MCF10A cells with centrosome amplification (+Dox) expressing Raichu-Rac-CFP as in Supplementary Movie 6. Overlapping regions between adjacent cells are marked by the white arrows. Scale bar :10 $\mu$ m

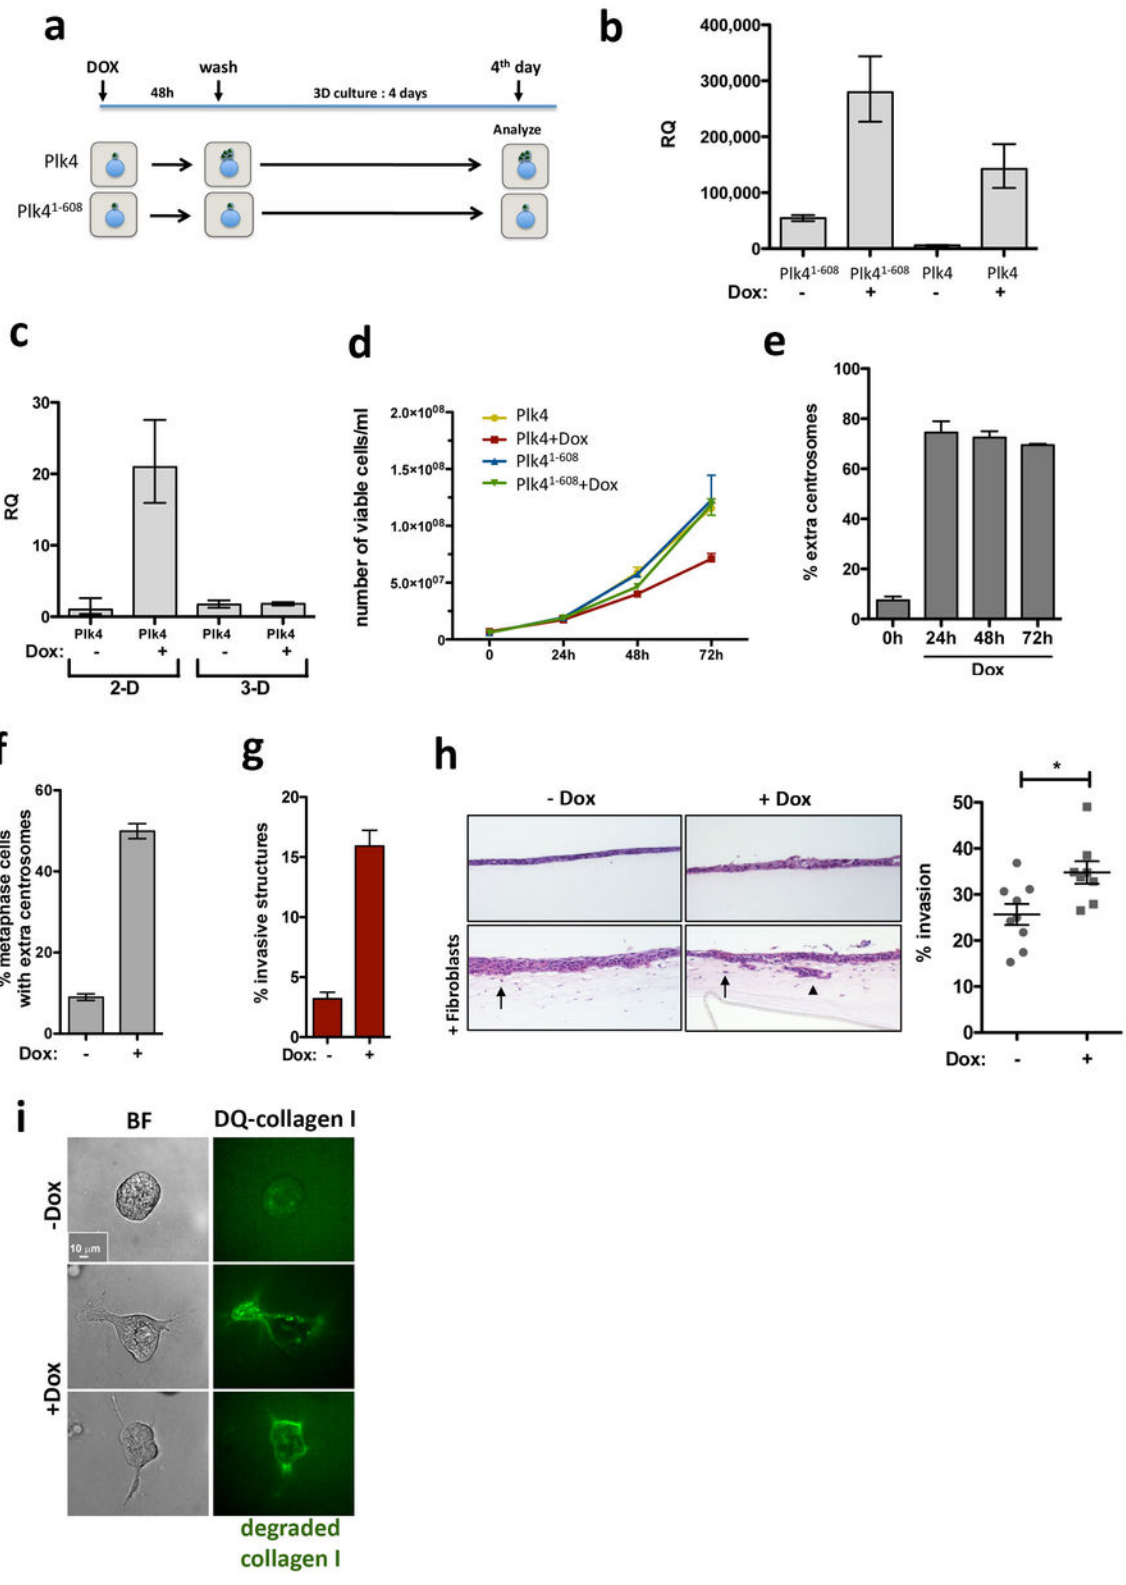

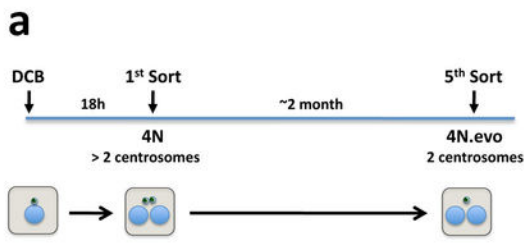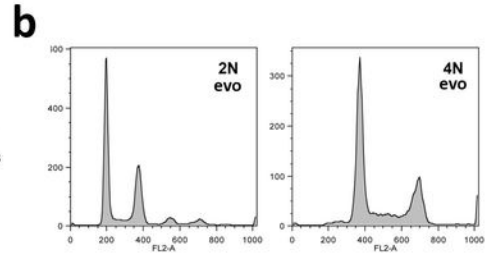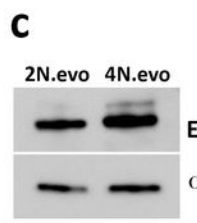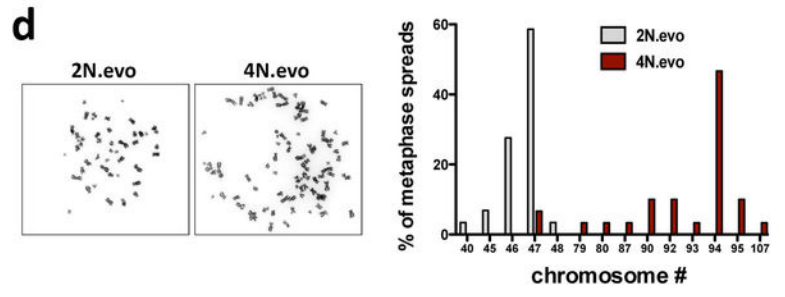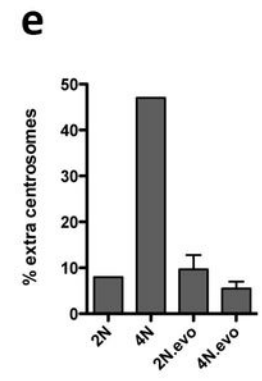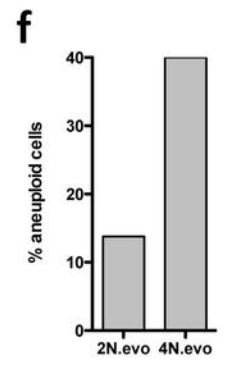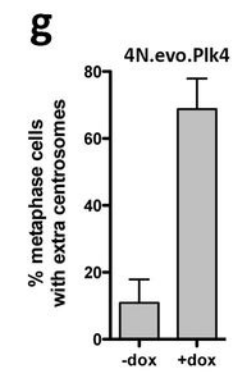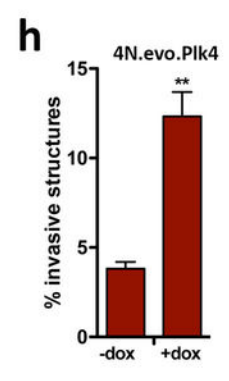

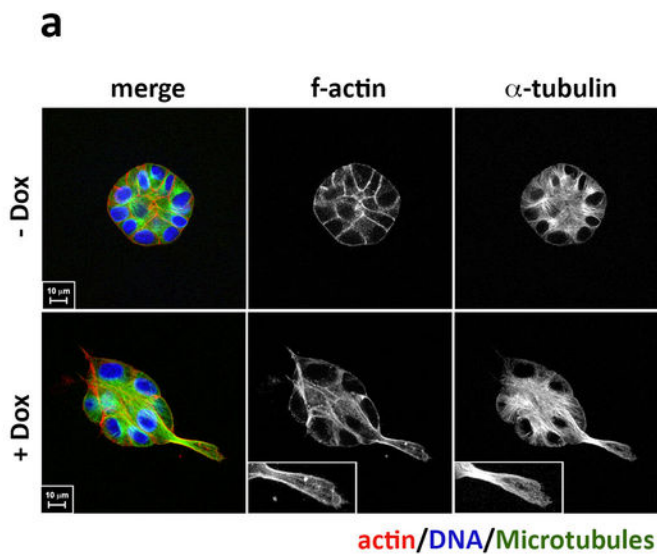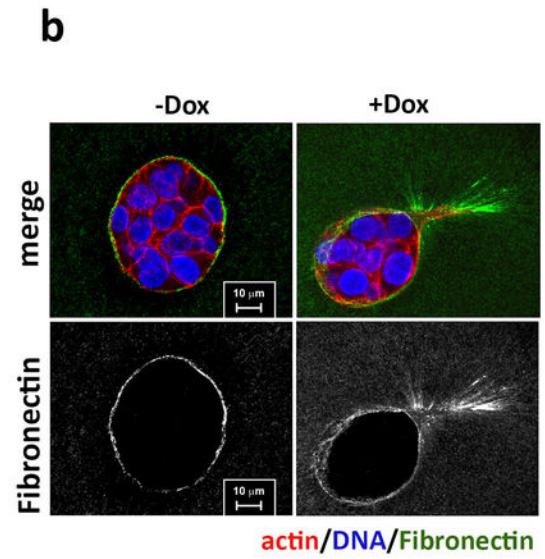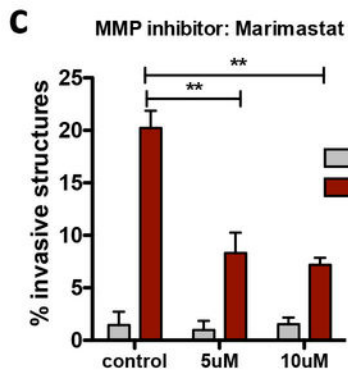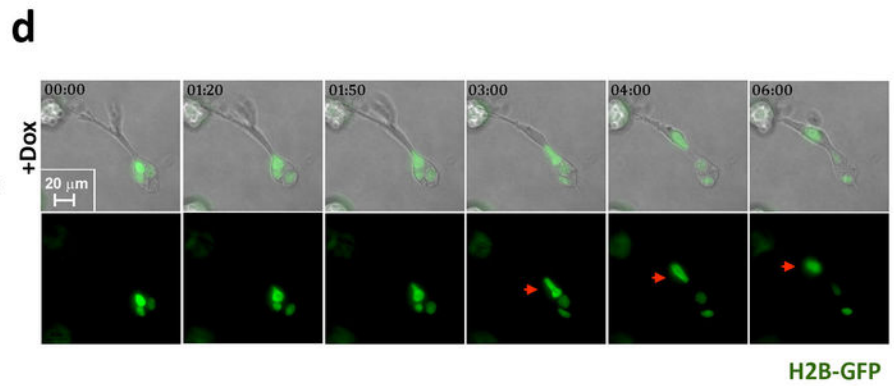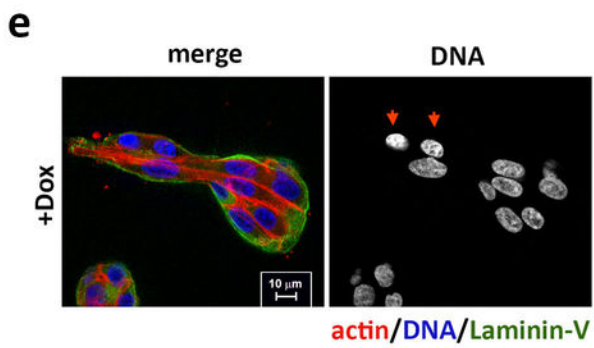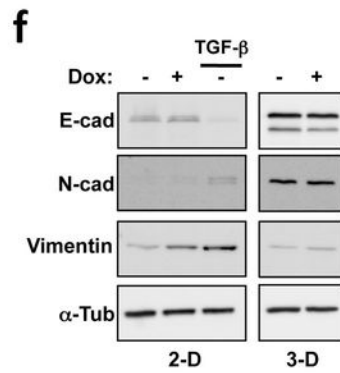

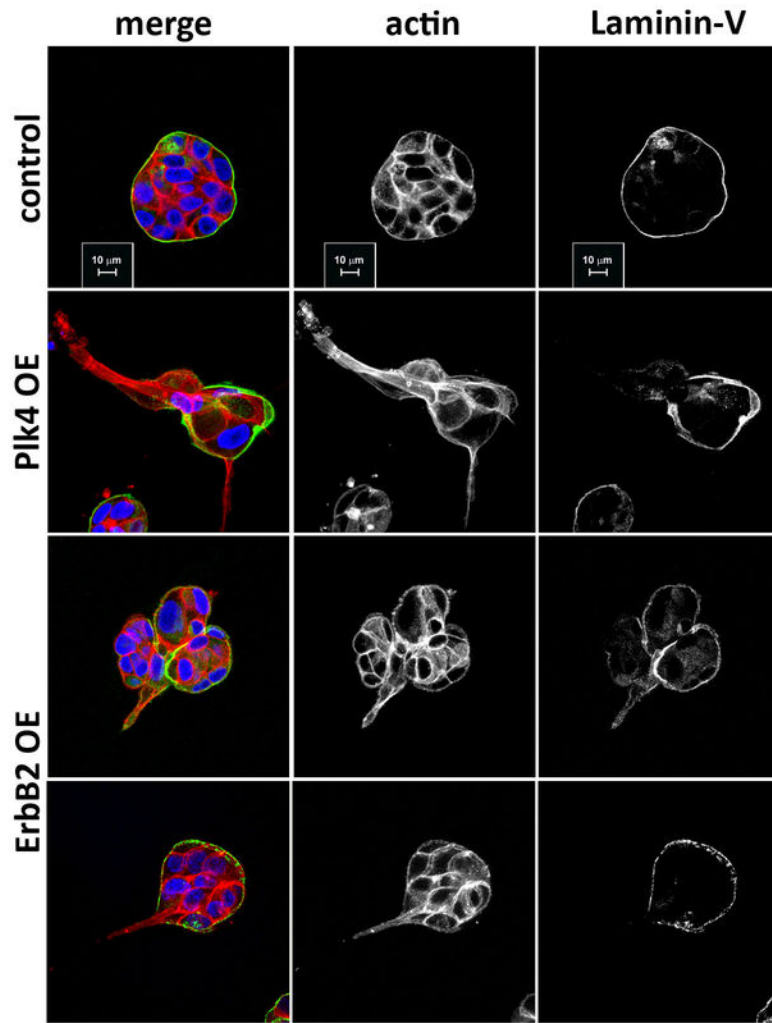

**a**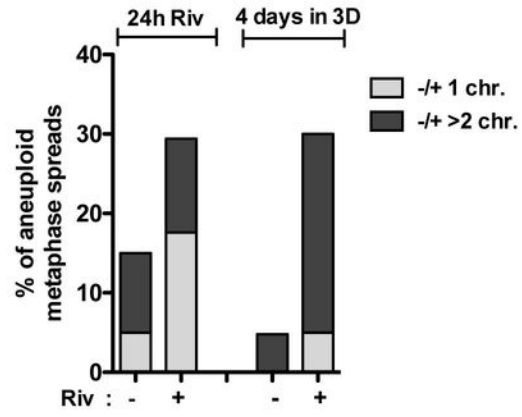**b**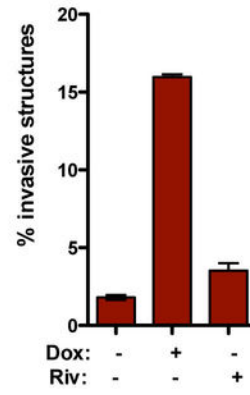**c**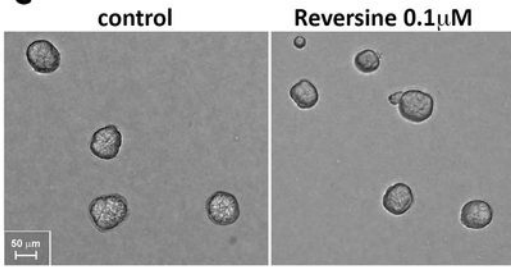**d**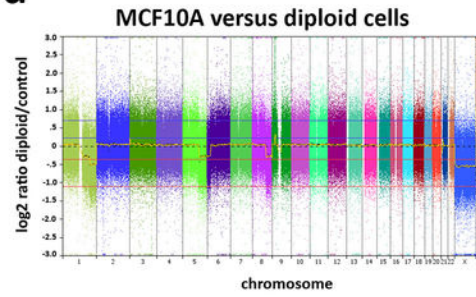

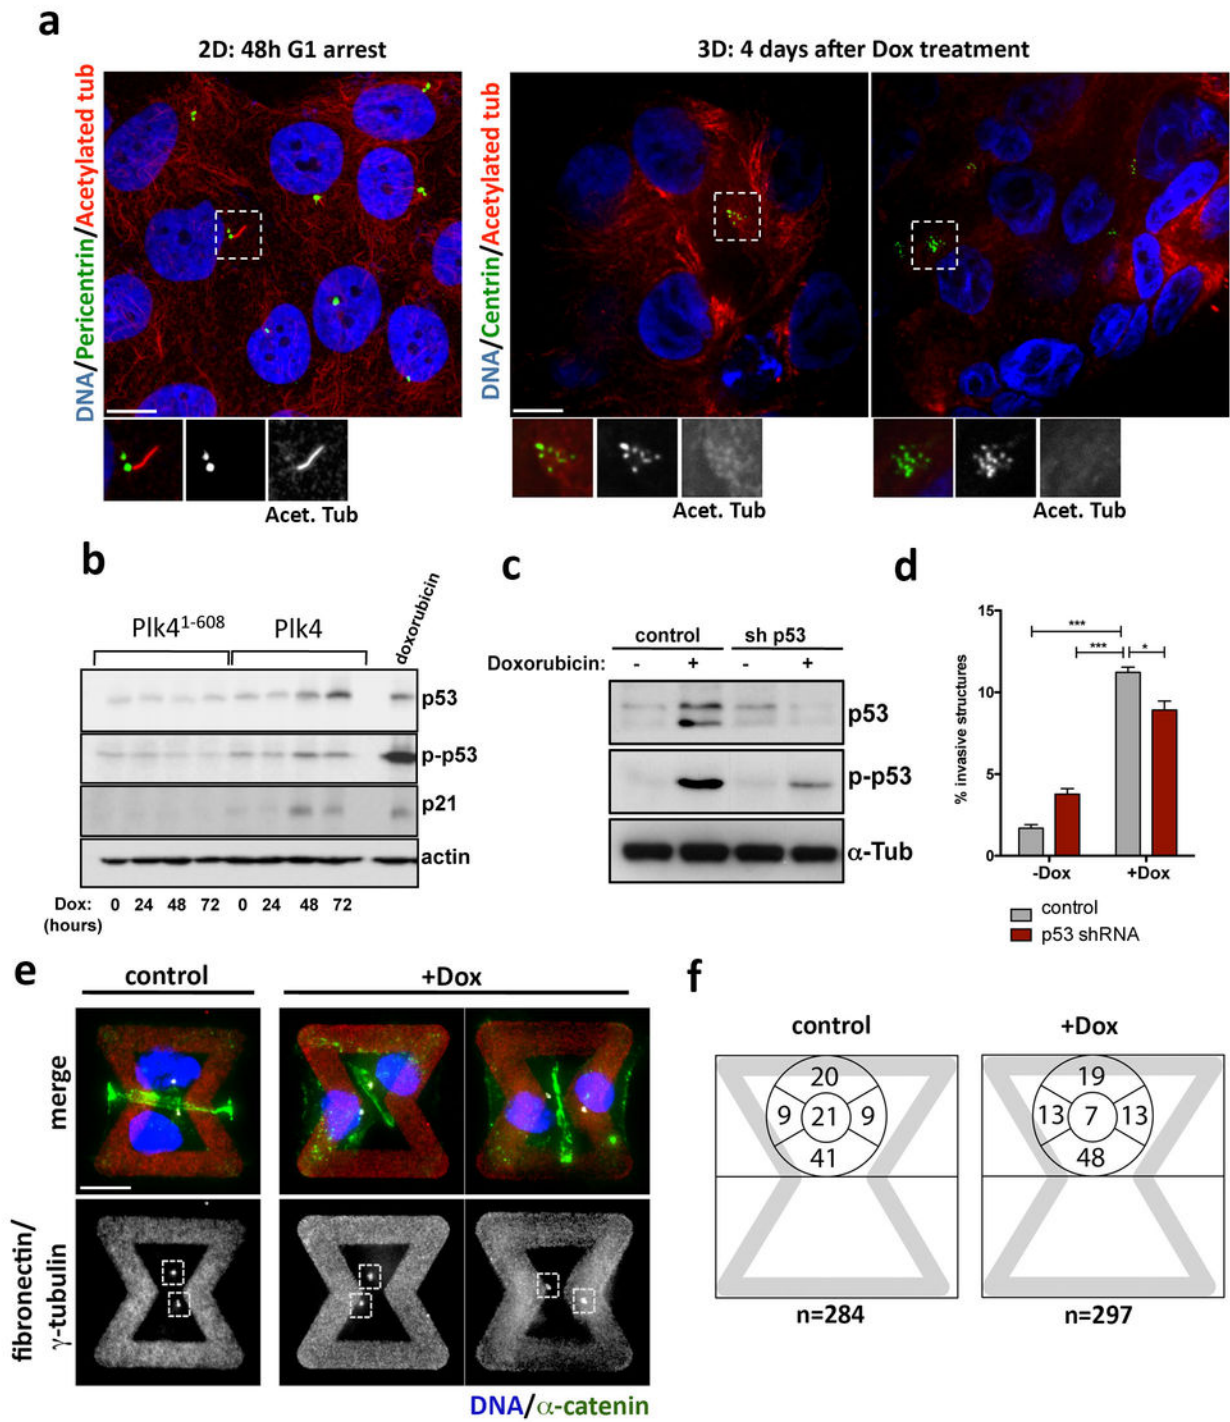



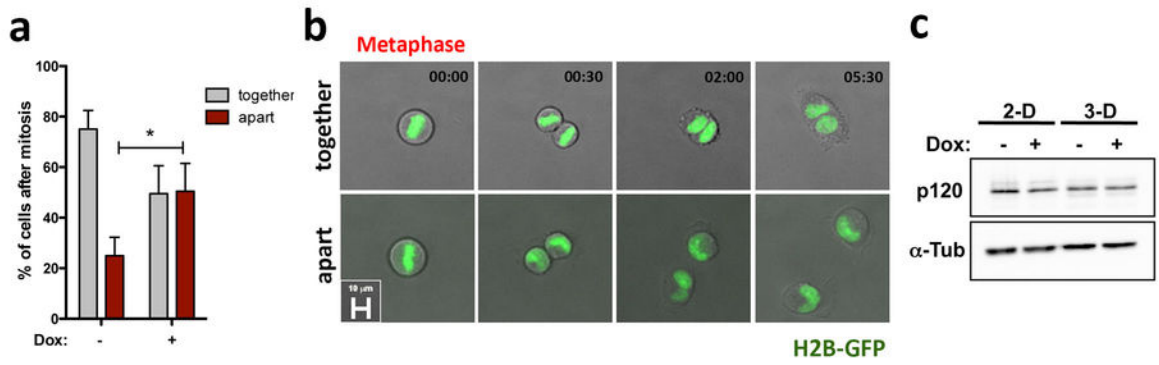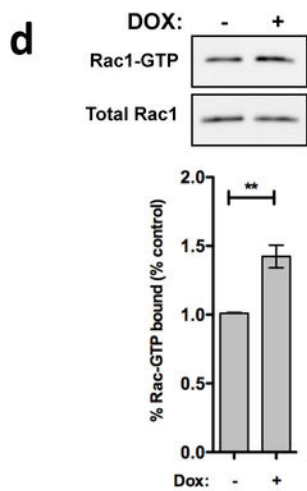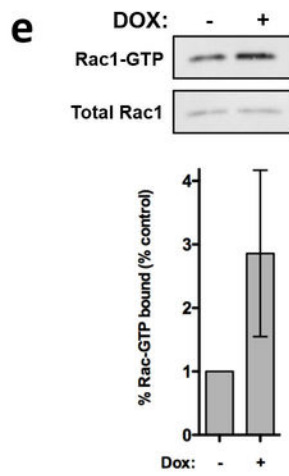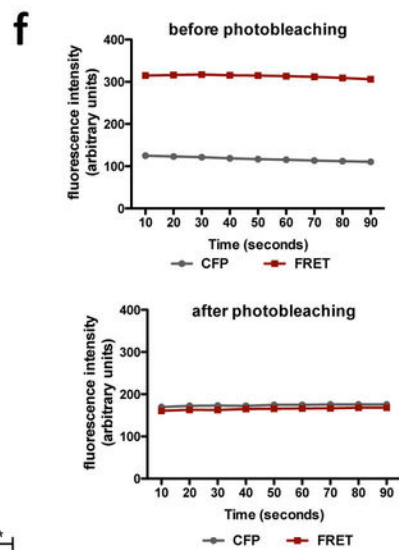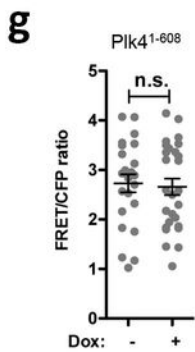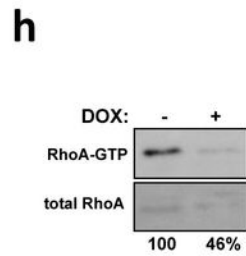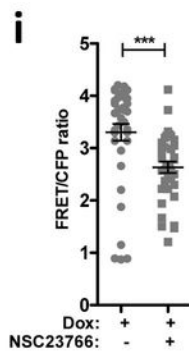

**a**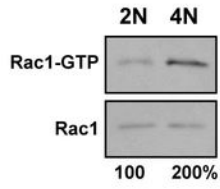**b**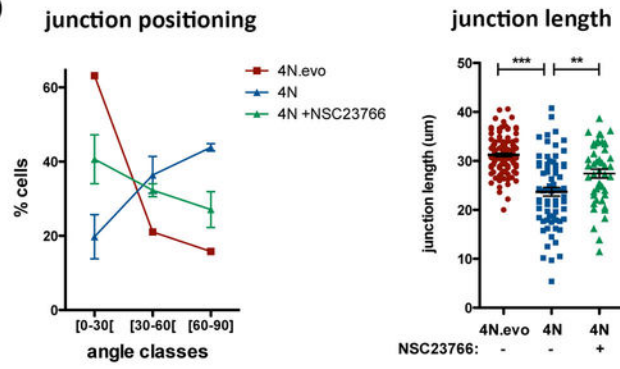**c**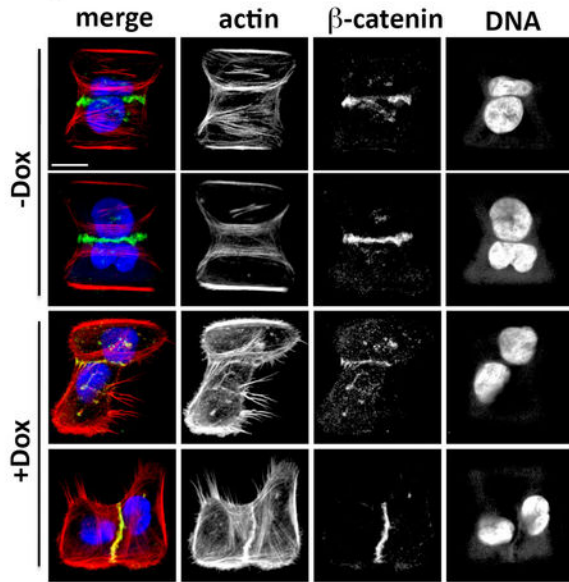**d**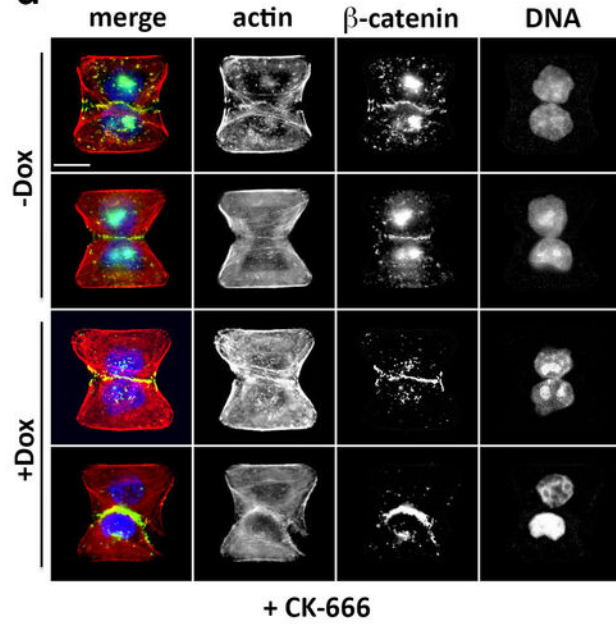**e**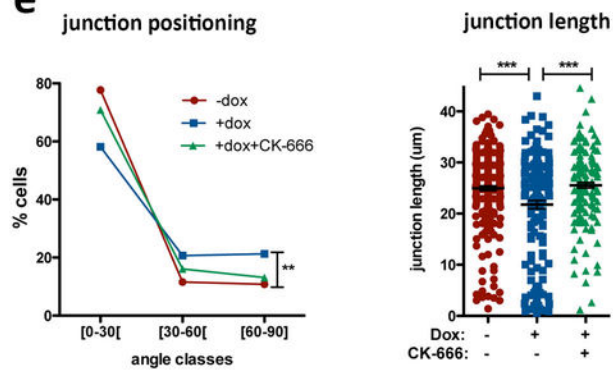

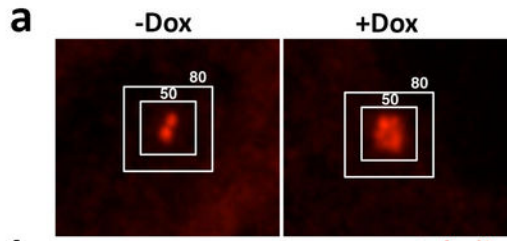

**b**

Inner area = 50x50 pixels = 2500 pixels<sup>2</sup>  
 Outer area = 80x80 pixels = 6400 pixels<sup>2</sup>  
 Area between outer and inner regions = 3900 pixels<sup>2</sup>

$F_1$  = Integrated fluorescence within inner region  
 $F_0$  = Integrated fluorescence within outer region  
 $F_{\text{Background}} = (F_0 - F_1)(2500/3900)$

$F_{\text{centrosome}} = F_1 - F_{\text{Background}}$

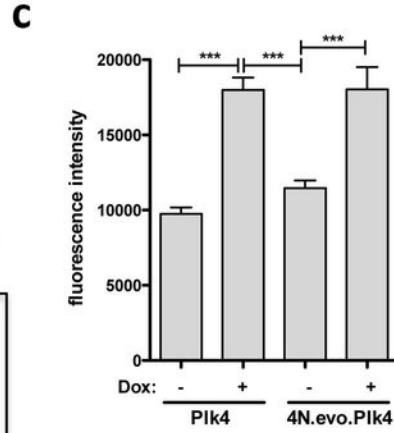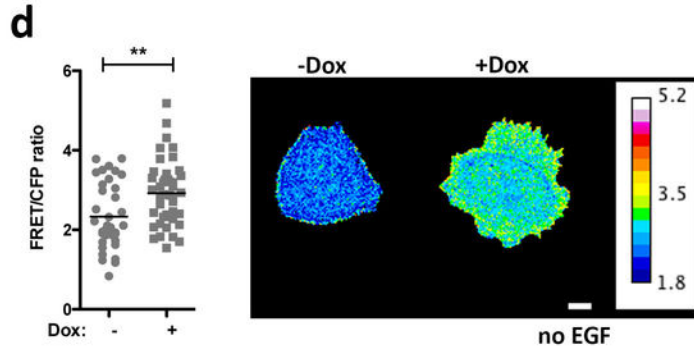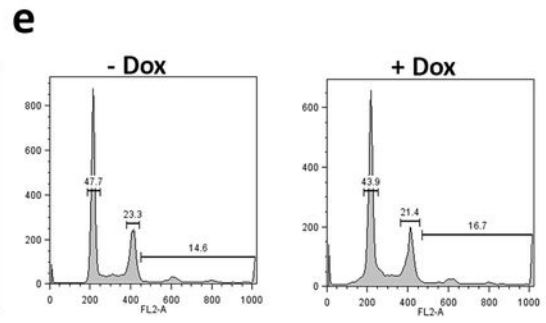

**a**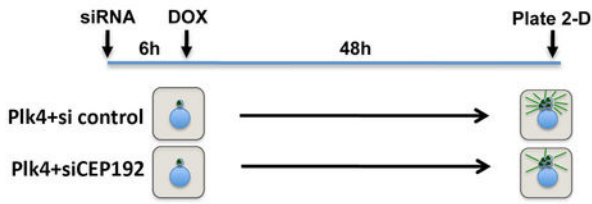**b**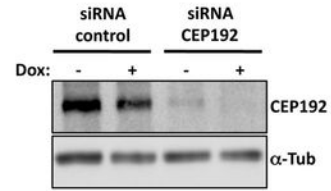**c**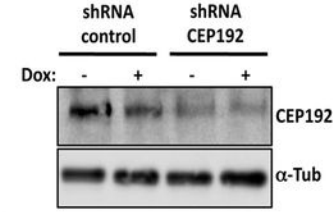**d**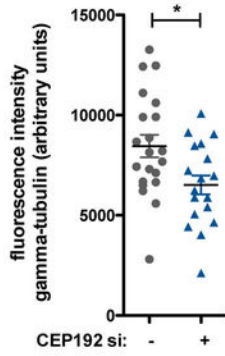**e**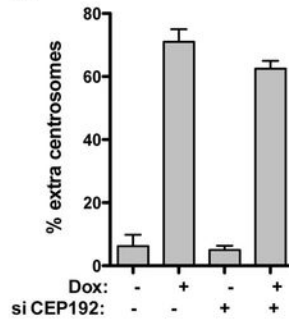**f**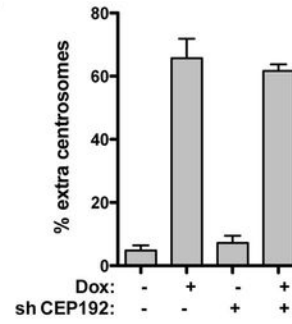**g**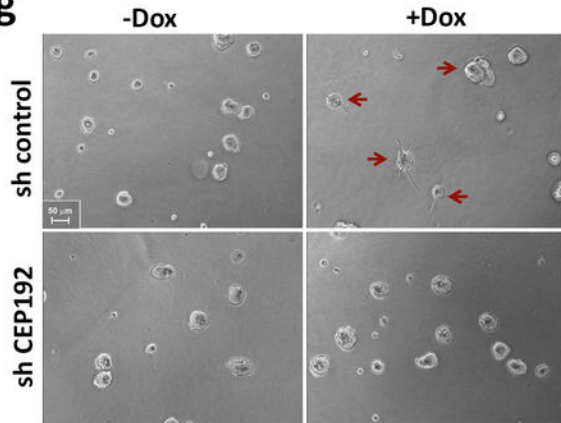**h**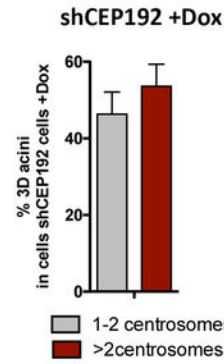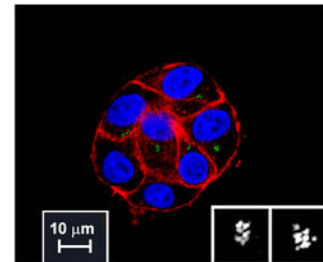**i**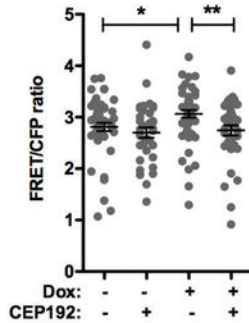

Supplement: NIHMS57671-supplement-1.pdf [file NIHMS57671-supplement-1.pdf]
